# Supplementary material
Source: Springer Nature journal article supplement (https://www.springermedizin.de/resource/supplementary/12889_2007_1188_MOESM1_ESM.pdf/9502646)
Supplement: MOESM1 [file 9502646]

Eligible sample at start of secondary school pupils for study in 1996 schools (N) = 25, students (n) = 8430

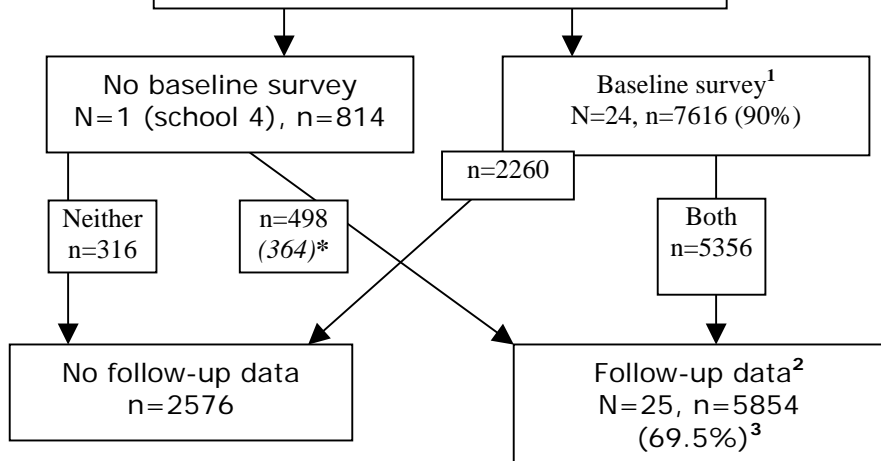

Follow-up data of usable quality for statistical analysis<sup>4</sup>

450 pupils never had the opportunity to complete demographic data (see above 316, plus (498 – 364) 134 = 450). Mainly due to withdrawal of one school from baseline.

230 pupils opted not to complete the demographic data.  
82 pupils opted not to complete over 75% of the variables required for this analysis.

Thus, 762 pupils were excluded from statistical analysis.

Leaving data from N=24, n=5092 (67% of those participating at baseline)

- \* Pupils whose demographic data, including social class, were subsequently collected at follow-up.
- <sup>1</sup> Baseline data was collected from Cohort 1 mid-August to mid-December 1996 and Cohort 2 mid-August to mid-December 1997
- <sup>2</sup> Follow-up data was collected from Cohort 1 mid-August to mid-December 1998 and Cohort 2 mid-August to mid-December 1999
- <sup>3</sup> Percentage of those in the original eligible sample.
- <sup>4</sup> Pupils had been told they could omit specific questions if too sensitive
